# Supplementary material
Source: PubMed Central journal article supplement (PMC3947402)

# Supplemental Figures

S1

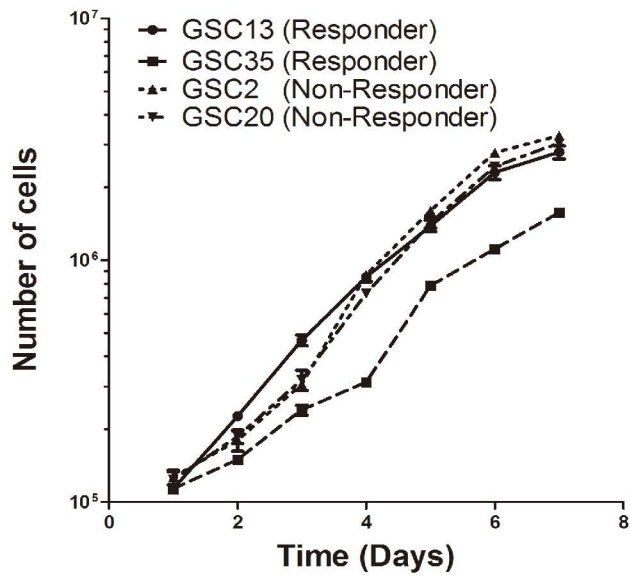

S2

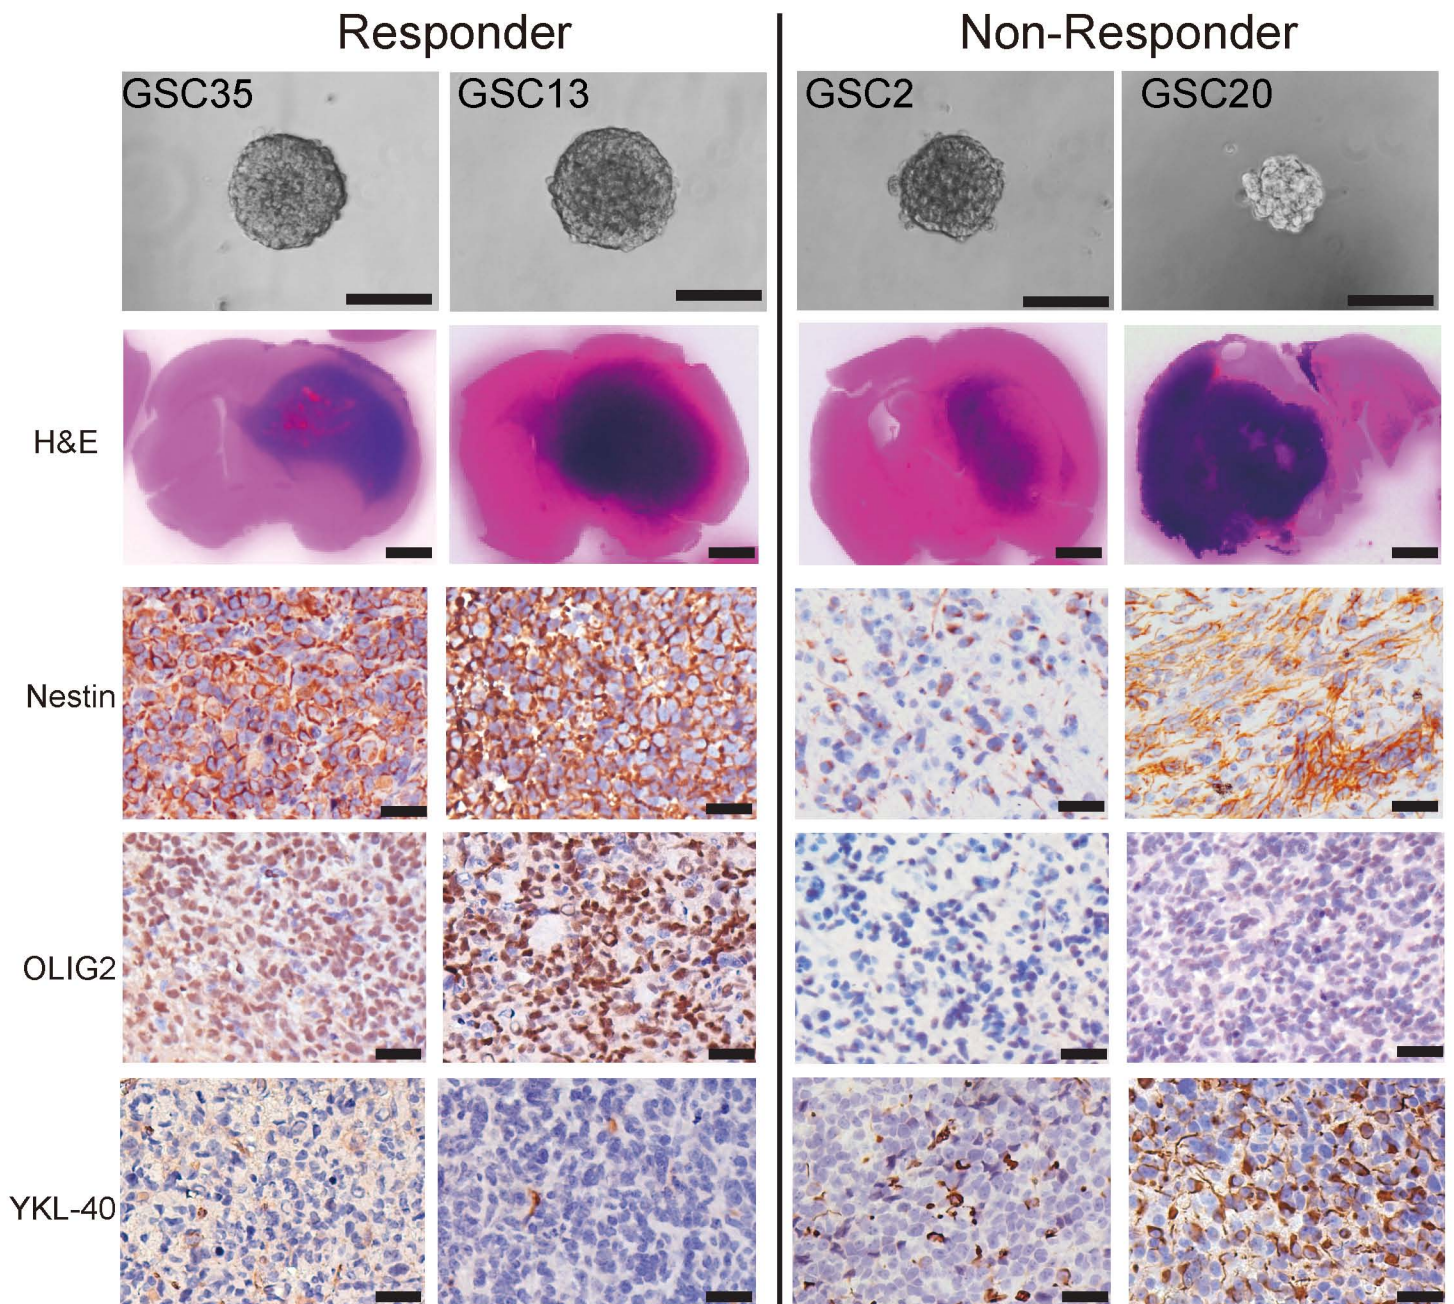

## Supplemental Figures

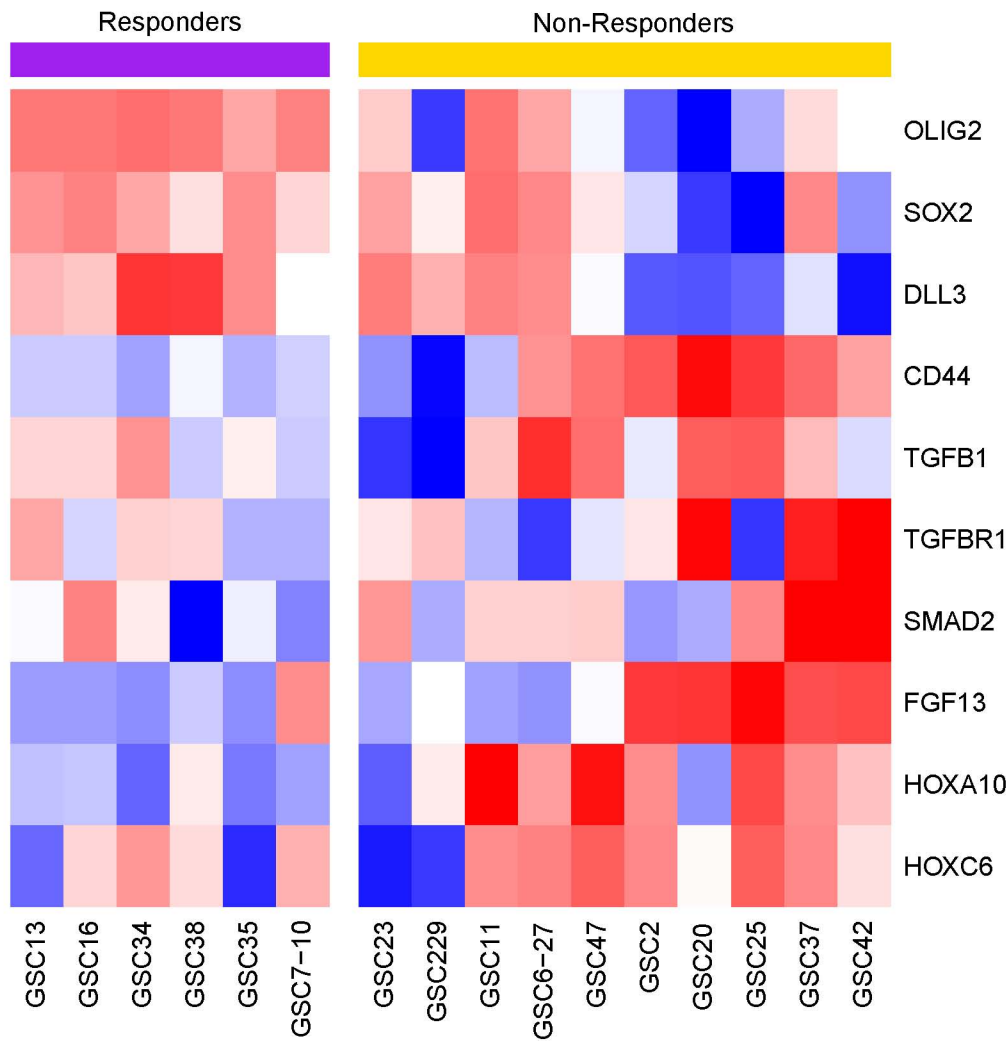

# Supplemental Figures

## S4

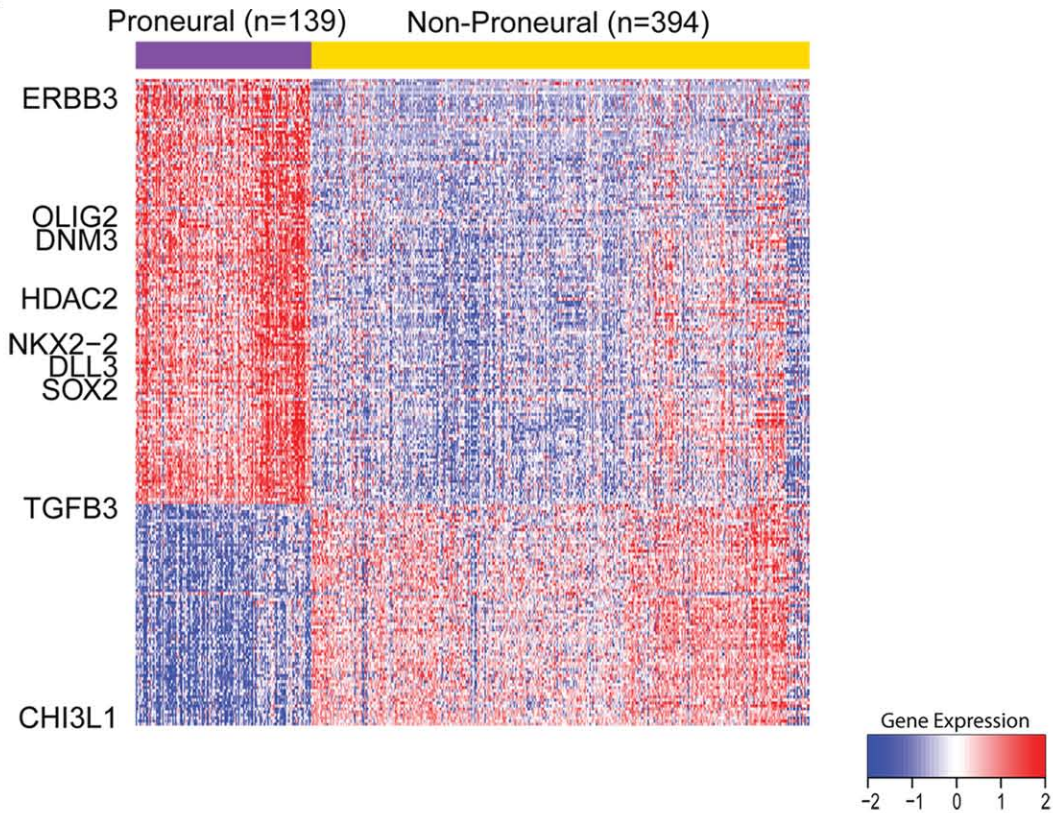

## S5

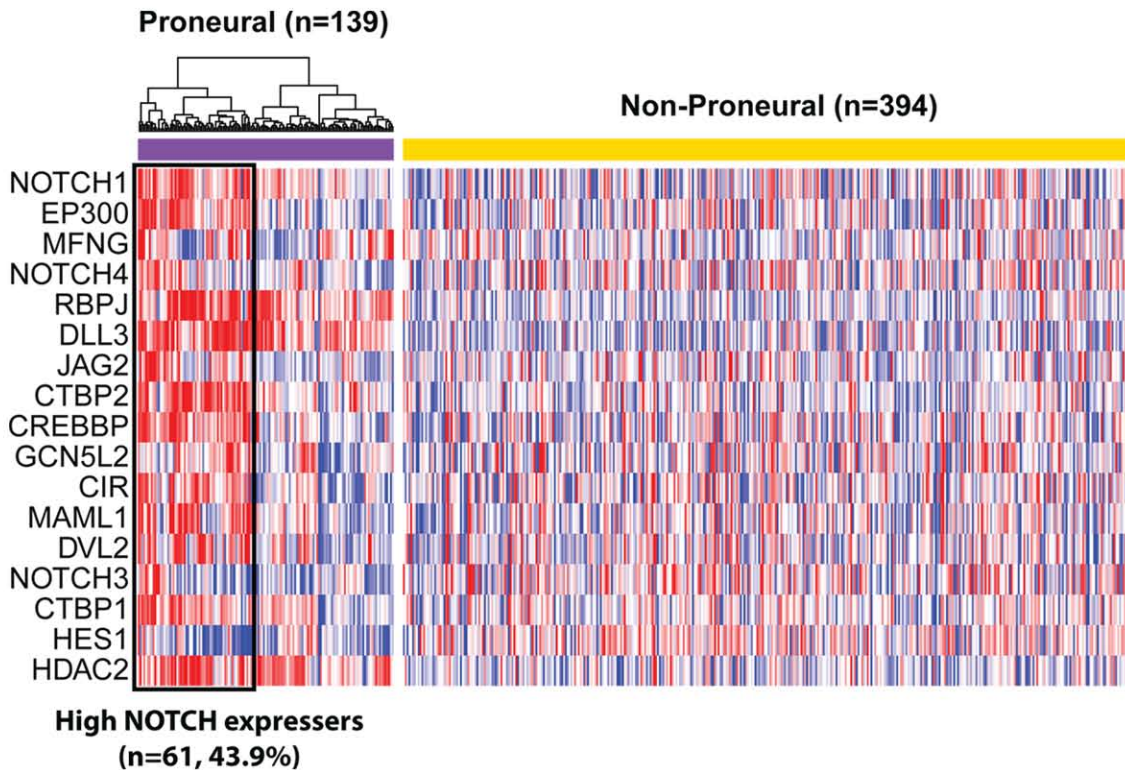

Supplement: NIHMS521974-supplement-Supp_Fig_S1-S5.pdf [file NIHMS521974-supplement-Supp_Fig_S1-S5.pdf]
